# Supplementary material
Source: MDPI journal article supplement (https://www.mdpi.com/2073-4441/14/2/206)
Supplement: s1 [file s1]

**Table S1.** XRF characterization of red mud (wt %).

| Composition of red mud | CaO  | Al <sub>2</sub> O <sub>3</sub> | SiO <sub>2</sub> | Na <sub>2</sub> O | TiO <sub>2</sub> | Fe <sub>2</sub> O <sub>3</sub> | MnO <sub>2</sub> |
|------------------------|------|--------------------------------|------------------|-------------------|------------------|--------------------------------|------------------|
| Proportion             | 5.05 | 25.37                          | 12.23            | 7.65              | 4.54             | 39.32                          | 0.12             |

**Table S2.** Scale method.

| Intensity of Importance | Comparison between A <sub>i</sub> and A <sub>j</sub> |
|-------------------------|------------------------------------------------------|
| 1                       | Equal importance                                     |
| 3                       | Moderate importance                                  |
| 5                       | Strong importance                                    |
| 7                       | Very strong importance                               |
| 9                       | Extreme importance                                   |
| 2, 4, 6, 8              | Intermediate values                                  |

**Table S3.** Construction of pairwise comparison matrix.

| Index          | A <sub>1</sub>  | A <sub>2</sub>  | A <sub>3</sub>  | ..... | A <sub>n</sub>  |
|----------------|-----------------|-----------------|-----------------|-------|-----------------|
| A <sub>1</sub> | b <sub>11</sub> | b <sub>12</sub> | b <sub>13</sub> | ..... | b <sub>1n</sub> |
| A <sub>2</sub> | b <sub>21</sub> | b <sub>22</sub> | b <sub>23</sub> | ..... | b <sub>2n</sub> |
| A <sub>3</sub> | b <sub>31</sub> | b <sub>32</sub> | b <sub>33</sub> | ..... | b <sub>3n</sub> |
| .....          | .....           | .....           | .....           | ..... | .....           |
| A <sub>n</sub> | b <sub>n1</sub> | b <sub>n2</sub> | b <sub>n3</sub> | ..... | b <sub>nn</sub> |

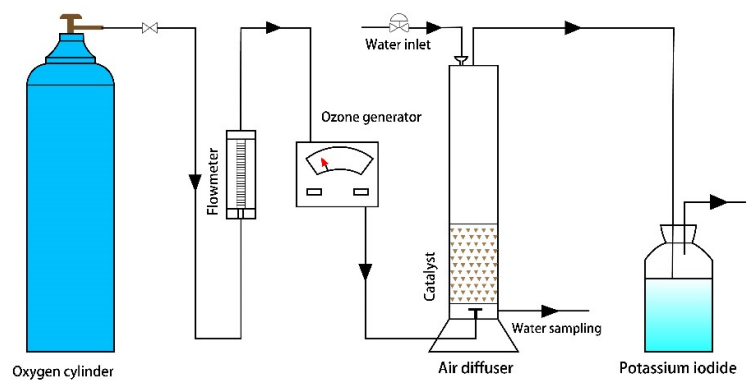

**Figure. S1.** Ozone catalytic reaction flow chart.

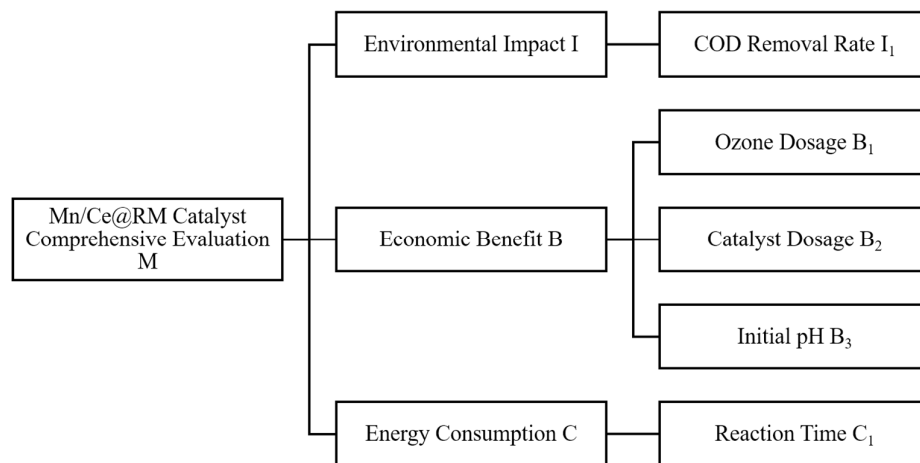

**Figure. S2.** Comprehensive evaluation index system of Mn/Ce@RM catalyst.

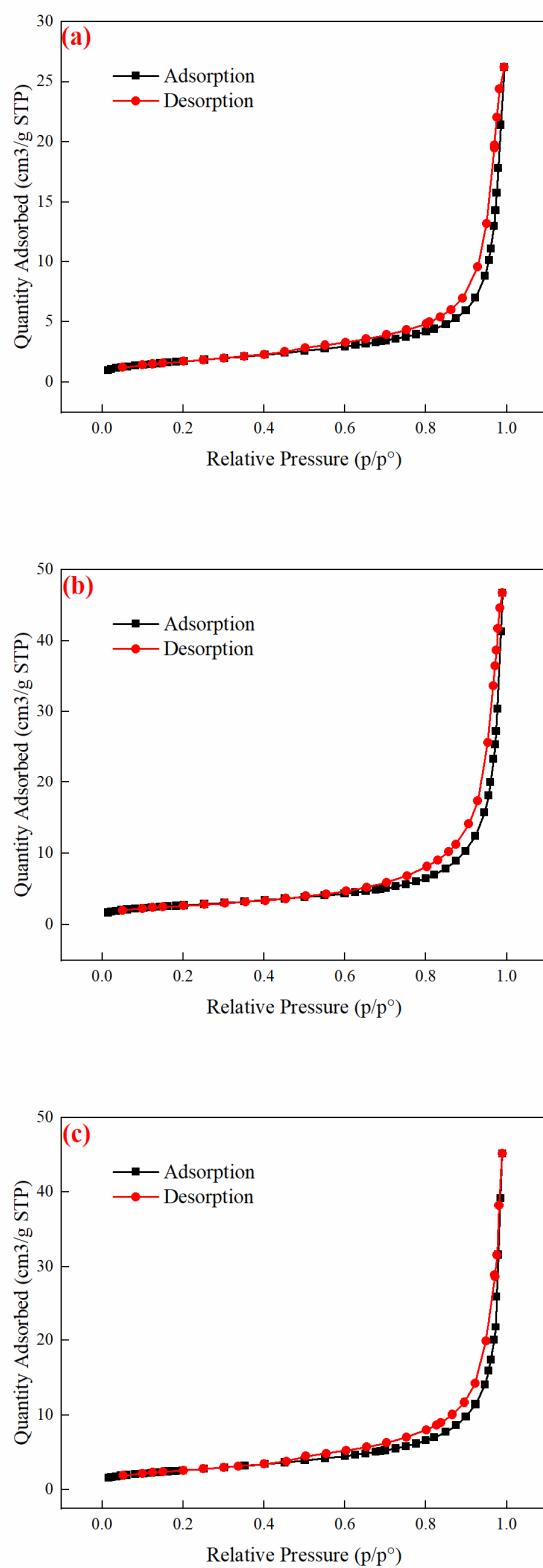

**Figure S3.** BET characterization results: (a)Red mud blank sample, (b)Optimal Mn/Ce@RM catalyst sample, (c) Mn/Ce@RM catalyst reuse 25 times.

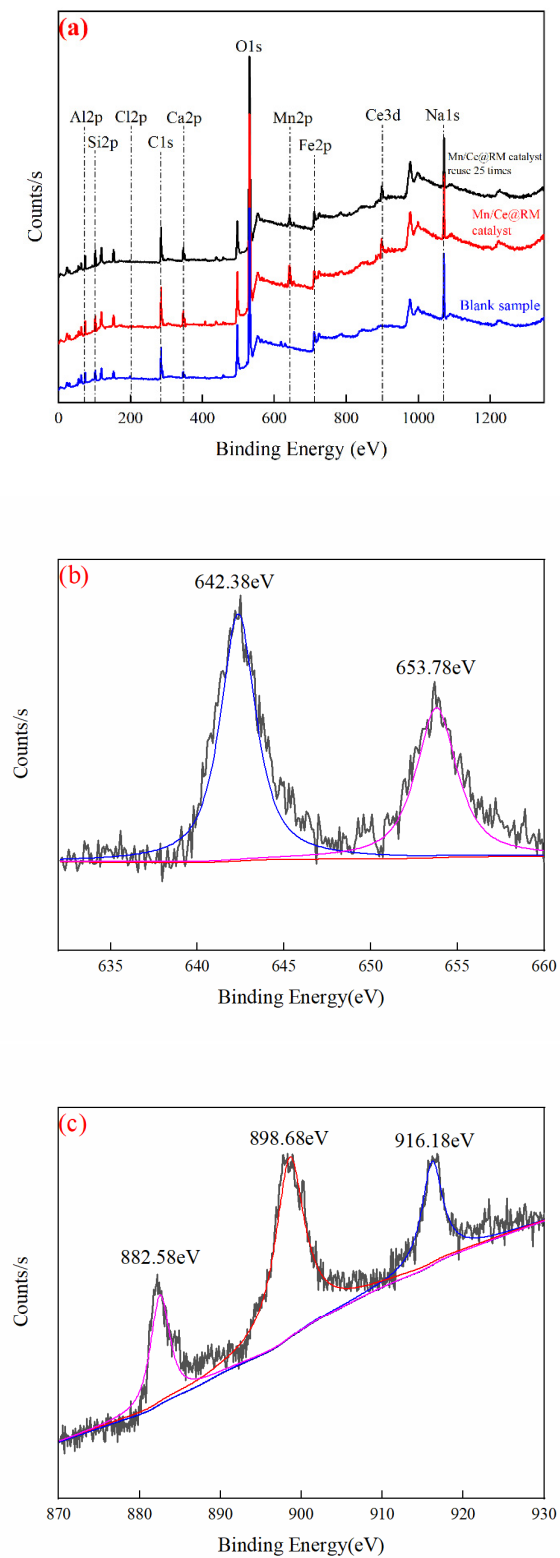

**Figure.S4.** XPS characterization results: (a) XPS full spectrum, (b) Mn peak fitting, (c) Ce peak fitting.

**TEXT S1** The calculation of index weight and consistency check, the calculation of index membership, and the structure of factor evaluation set R.

### 2.5.3 Calculation of index weight and consistency test

#### (1) Calculation of weight vector

Calculation of index weight  $W_i$  is shown in functions 1 to 3:

$$B_i = \prod_{j=1}^n b_{ij} (i=1,2,3,\dots,n) \quad (1)$$

$$W_i = (B_i)^{\frac{1}{n}} \quad (2)$$

$$W_i' = \frac{W_i}{\sum_{j=1}^n W_j} \quad (3)$$

$W_e = [W_1', W_2', W_3', \dots, W_n']^T$  is the desired weight vector

#### (2) Consistency test

In order to ensure the credibility of the fuzzy analytic hierarchy process of Mn/Ce@RM catalyst, the weights need consistency test, as shown in functions 4 to 6:

$$\lambda_{\max} = \sum_{i=1}^n \frac{(AW_e)_i}{nW_i'} = \frac{1}{n} \sum_{i=1}^n \frac{\sum_{j=1}^n b_{ij} W_j}{W_i'} \quad (4)$$

$$CI = \frac{\lambda_{\max} - n}{n - 1} \quad (5)$$

$$CR = \frac{CI}{RI} \times 100\% \leq 0.1 \quad (6)$$

RI is the mean consistency index, and its value is shown in Table S4.

**Table S4.** The value standard of RI.

| n  | 1    | 2    | 3    | 4    | 5    | 6    | 7    | 8    | 9    |
|----|------|------|------|------|------|------|------|------|------|
| RI | 0.00 | 0.00 | 0.58 | 0.90 | 1.12 | 1.24 | 1.32 | 1.41 | 1.45 |

The consistency test is passed when  $CI \leq 0.1$ . Use the method above to calculate the five indicators

selected in this article and rank them according to the importance of each indicator in this evaluation level relative to the indicators in the previous level. The index ranking results are shown in Tables S5-S9.

**Table S5.** Judgment matrix of evaluation layer to target layer and single ranking result.

| <b>M</b>               | <b>I</b> | <b>B</b> | <b>C</b> | <b>Weigh <math>W_i</math></b> |
|------------------------|----------|----------|----------|-------------------------------|
| Environmental impact I | 1        | 1/3      | 1        | 0.200                         |
| Economic benefit B     | 3        | 1        | 3        | 0.600                         |
| Energy consumption C   | 1        | 1/3      | 1        | 0.200                         |

**Table S6.** Judgment matrix and single ranking result of index layer's impact on Environment.

| <b>I</b>                        | <b>I<sub>1</sub></b> | <b>weight <math>W_i</math></b> |
|---------------------------------|----------------------|--------------------------------|
| COD removal rate I <sub>1</sub> | 1                    | 1.000                          |

**Table S7.** The judgment matrix of economic benefit in index level and the result of single rank.

| <b>B</b>                       | <b>B<sub>1</sub></b> | <b>B<sub>2</sub></b> | <b>B<sub>3</sub></b> | <b>weight <math>W_i</math></b> |
|--------------------------------|----------------------|----------------------|----------------------|--------------------------------|
| Ozone dosage B <sub>1</sub>    | 1                    | 1                    | 1                    | 0.333                          |
| Catalyst dosage B <sub>2</sub> | 1                    | 1                    | 1                    | 0.334                          |
| Initial pH B <sub>3</sub>      | 1                    | 1                    | 1                    | 0.333                          |

**Table S8.** Judgment matrix and single ranking result of energy consumption in index layer.

| <b>C</b>                     | <b>C<sub>1</sub></b> | <b>weight <math>W_i</math></b> |
|------------------------------|----------------------|--------------------------------|
| Reaction time C <sub>1</sub> | 1                    | 1.000                          |

**Table S9.** The total ranking weight of each index layer.

| <b>Goal</b>                                        | <b>Criteria</b>                   | <b>Sub-criteria</b>             | <b>Group ranking weight</b> | <b>Total ranking weight</b> |
|----------------------------------------------------|-----------------------------------|---------------------------------|-----------------------------|-----------------------------|
| Mn/Ce@RM Catalyst<br>Comprehensive<br>Evaluation M | Environmental impact I<br>(0.200) | COD removal rate I <sub>1</sub> | 1.000                       | 0.200                       |
|                                                    | Economic benefit B<br>(0.600)     | Ozone dosage B <sub>1</sub>     | 0.333                       | 0.200                       |
|                                                    |                                   | Catalyst dosage B <sub>2</sub>  | 0.334                       | 0.200                       |
|                                                    |                                   | Initial pH B <sub>3</sub>       | 0.333                       | 0.200                       |
|                                                    | Energy consumption C<br>(0.200)   | Reaction time C <sub>1</sub>    | 1.000                       | 0.200                       |

#### 2.5.4 Calculation of degree of membership

According to the index system determined above, the set of evaluation factors are:

$$U=\{\text{Environmental impact } u_1, \text{Economic benefit } u_2, \text{Energy consumption } u_3\},$$

$$u_1=\{\text{COD removal rate } u_{11}\},$$

$u_2=\{\text{Ozone dosage } u_{21}, \text{Catalyst dosage } u_{22}, \text{Initial pH } u_{23}\},$

$u_3=\{\text{Reaction time } u_{31}\}$

According to the comprehensive evaluation index weight of Mn/Ce@RM catalyst determined by the AHP above, the weight set W is:

$$W = [0.200, 0.200, 0.200, 0.200, 0.200]$$

The five indexes selected in this article are classified according to quantitative index and qualitative index, which are shown in Table S10.

**Table S10.** Comprehensive evaluation index classification of Mn/Ce@RM based ozone catalyst.

| Classification     | Index                           |
|--------------------|---------------------------------|
| Quantitative index | COD removal rate I <sub>1</sub> |
|                    | Ozone dosage B <sub>1</sub>     |
|                    | Catalyst dosage B <sub>2</sub>  |
| Qualitative index  | Reaction time C <sub>1</sub>    |
|                    | Initial pH B <sub>3</sub>       |

For benefit index (the larger index value, the better evaluation) of quantitative indexes, use function 7 to determine the degree of membership:

$$\mu(a) = e^{-2.1(a_j^{\max} - a_{ij}) / (a_j^{\max} - a_j^{\min})} \quad (7)$$

Where,  $a_{ij}$  — The j-th index of the i-th plan;

$a_j^{\max}$  — The maximum value of the j-th index;

$a_j^{\min}$  — The minimum value of the j-th index

For cost index (the smaller index value, the better evaluation) of quantitative indexes, use function 8 to determine the degree of membership:

$$\mu(a) = e^{-2.1(a_{ij} - a_j^{\min}) / (a_j^{\max} - a_j^{\min})} \quad (8)$$

Where,  $a_{ij}$  — The j-th index of the i-th plan;

$a_j^{\max}$  — The maximum value of the j-th index;

$a_j^{min}$  — The minimum value of the j-th index

Since qualitative index cannot be directly numerically valued, the ten-point system is used to assign values to qualitative index. Table S11 shows specific assignment standards. The value obtained after the assignment is a benefit index. Therefore, function 7 is used to calculate the degree of membership. The experimental results of Mn/Ce@RM catalytic ozonation degrading biochemical tail water are summarized in Table S12. According to the data standardization method introduced above, the five evaluation indexes are calculated, and the calculation results are as follows:

**Table S11.** Qualitative index evaluation standard.

| Qualitative index         | Extremely reasonable | More reasonable | Medium | Less reasonable | Totally unreasonable |
|---------------------------|----------------------|-----------------|--------|-----------------|----------------------|
| Initial pH B <sub>3</sub> | 8-10                 | 6-8             | 4-6    | 2-4             | 0-2                  |

**Table S12.** Summary of experimental results.

| Operating condition | Environmental impact            | Economic benefit B |                 | Energy consumption        |                              |
|---------------------|---------------------------------|--------------------|-----------------|---------------------------|------------------------------|
|                     | I                               | Ozone dosage       | Catalyst dosage | Initial pH B <sub>3</sub> | Reaction time C <sub>1</sub> |
|                     | COD removal rate I <sub>1</sub> | B <sub>1</sub>     | B <sub>2</sub>  |                           |                              |
|                     | %                               | g/h                | g/L             | /                         | min                          |
| A <sub>1</sub>      | 72.33                           | 2.0                | 50              | 7.3 (原水)                  | 80                           |
| A <sub>2</sub>      | 73.45                           | 2.0                | 50              | 7.3 (原水)                  | 100                          |
| A <sub>3</sub>      | 73.49                           | 2.0                | 50              | 7.3 (原水)                  | 120                          |
| A <sub>4</sub>      | 73.51                           | 2.0                | 50              | 7.3 (原水)                  | 140                          |
| B <sub>1</sub>      | 66.47                           | 1.6                | 50              | 7.3 (原水)                  | 80                           |
| B <sub>2</sub>      | 75.68                           | 2.0                | 50              | 7.3 (原水)                  | 80                           |
| B <sub>3</sub>      | 76.38                           | 2.4                | 50              | 7.3 (原水)                  | 80                           |
| C <sub>1</sub>      | 67.84                           | 2.0                | 37.5            | 7.3 (原水)                  | 80                           |
| C <sub>2</sub>      | 76.91                           | 2.0                | 50              | 7.3 (原水)                  | 80                           |
| C <sub>3</sub>      | 79.95                           | 2.0                | 62.5            | 7.3 (原水)                  | 80                           |
| D <sub>1</sub>      | 65.48                           | 2.0                | 62.5            | 5                         | 80                           |
| D <sub>2</sub>      | 76.97                           | 2.0                | 62.5            | 7                         | 80                           |
| D <sub>3</sub>      | 84.96                           | 2.0                | 62.5            | 9                         | 80                           |

(1) COD removal rate I<sub>1</sub>

Use function 7 to calculate degree of membership of COD removal rate, and the degree of membership

function is  $\mu(a) = e^{-2.1(0.8496-a_{ij})/0.1948}$ . According to Table S12, the calculation results are as follows:

$$(a_1)_{13 \times 1} = \begin{bmatrix} 0.2563, 0.2891, 0.2904, 0.2910, 0.1362, 0.3677, 0.3966, \\ 0.1579, 0.4199, 0.5827, 0.1225, 0.4226, 1.0000 \end{bmatrix}^T$$

(2) Ozone dosage B<sub>1</sub>



Use function 8 to calculate degree of membership of ozone dosage, and the degree of membership

function is  $\mu(a) = e^{-2.1(a_{ij}-1.6)/0.8}$ . According to Table S12, the calculation results are as follows:

$$(a_2)_{13 \times 1} = \begin{bmatrix} 0.3499, 0.3499, 0.3499, 0.3499, 1.0000, 0.3499, 0.1225, \\ 0.3499, 0.3499, 0.3499, 0.3499, 0.3499, 0.3499 \end{bmatrix}^T$$

(3) Catalyst dosage B<sub>2</sub>

Use function 8 to calculate degree of membership of catalyst dosage, and the degree of membership

function is  $\mu(a) = e^{-2.1(a_{ij}-37.5)/25}$ . According to Table S12, the calculation results are as follows:

$$(a_3)_{13 \times 1} = \begin{bmatrix} 0.3499, 0.3499, 0.3499, 0.3499, 0.3499, 0.3499, 0.3499, \\ 1.0000, 0.3499, 0.1225, 0.1225, 0.1225, 0.1225 \end{bmatrix}^T$$

(4) Initial pH B<sub>3</sub>

Use function 7 to calculate degree of membership of initial pH, and the degree of membership function

is  $\mu(a) = e^{-2.1(9-a_{ij})/5}$ . According to Table S12, the calculation results are as follows:

$$(a_4)_{13 \times 1} = \begin{bmatrix} 0.6570, 0.6570, 0.6570, 0.6570, 0.6570, 0.6570, 0.6570, \\ 0.6570, 0.6570, 0.6570, 0.1225, 0.2837, 1.0000 \end{bmatrix}^T$$

(5) Reaction time C<sub>1</sub>

Use function 8 to calculate degree of membership of reaction time, and the degree of membership

function is  $\mu(a) = e^{-2.1(a_{ij}-80)/60}$ . According to Table S12, the calculation results are as follows:

$$(a_5)_{13 \times 1} = \begin{bmatrix} 1.0000, 0.4966, 0.2466, 0.1225, 1.0000, 1.0000, 1.0000, \\ 1.0000, 1.0000, 1.0000, 1.0000, 1.0000, 1.0000 \end{bmatrix}^T$$

## 2.5.5 Factor evaluation set R

From the degree of membership value of the five indexes in the previous section, the single-factor

evaluation set of Mn/Ce@RM catalyst can be obtained:

$$R_1 = [0.2563, 0.3499, 0.3499, 0.6570, 1.0000]$$

$$R_2 = [0.2891, 0.3499, 0.3499, 0.6570, 0.4966]$$

$$R_3 = [0.2904, 0.3499, 0.3499, 0.6570, 0.2466]$$

$$R_4 = [0.2910, 0.3499, 0.3499, 0.6570, 0.1225]$$

$$R_5 = [0.1362, 1.0000, 0.3499, 0.6570, 1.0000]$$

$$R_6 = [0.3677, 0.3499, 0.3499, 0.6570, 1.0000]$$

$$R_7 = [0.3966, 0.1225, 0.3499, 0.6570, 1.0000]$$

$$R_8 = [0.1579, 0.3499, 1.0000, 0.6570, 1.0000]$$

$$R_9 = [0.4199, 0.3499, 0.3499, 0.6570, 1.0000]$$

$$R_{10} = [0.5827, 0.3499, 0.1225, 0.6570, 1.0000]$$

$$R_{11} = [0.1225, 0.3499, 0.1225, 0.1225, 1.0000]$$

$$R_{12} = [0.4226, 0.3499, 0.1225, 0.2837, 1.0000]$$

$$R_{13} = [1.0000, 0.3499, 0.1225, 1.0000, 1.0000]$$

Then the multi-factor judgment set R of the comprehensive evaluation of Mn/Ce@RM catalyst is:

$$R = [R_1, R_2, \dots, R_{13}]^T$$

Combine the weight vector W obtained above with the multi-factor judgment set R to obtain the fuzzy

decision vector A:

$$\begin{aligned} A &= W \times R = [0.200, 0.200, 0.200, 0.200, 0.200] \times R \\ &= \begin{bmatrix} 0.5226, 0.4285, 0.3788, 0.3541, 0.6286, 0.5449, 0.5052, \\ 0.6330, 0.5554, 0.5424, 0.3435, 0.4357, 0.6945 \end{bmatrix} \end{aligned}$$

Table 5 shows the scores and rankings of each operating condition in this comprehensive evaluation.
